# Supplementary material for: Voltammetric pH sensor based on electrochemically modified pseudo-graphite
Source: Royal Society of Chemistry journal article supplement (doi:10.1039/d0an01405b), 2020-01-01
Supplement: d0an01405b1.pdf [file d0an01405b1.pdf]

### **Voltammetric pH Sensor Based on Electrochemically Modified Pseudo-Graphite**

Haoyu Zhu<sup>a</sup>, Tanim Hassan<sup>a</sup>, Humayun Kabir<sup>a</sup>, Jeremy May<sup>a</sup>, Kailash Hamal<sup>a</sup>, Ricardo Lopez<sup>a</sup>,  
Hailey J. Smith<sup>a</sup>, Nolan W. Nicholas<sup>b</sup>, Prasanna Sankaran<sup>c</sup>, David N. McIlroy<sup>d</sup>, I. Francis Cheng<sup>a,\*</sup>

<sup>a</sup>University of Idaho, Department of Chemistry, 875 Perimeter Dr., MS 2343, Moscow, ID, 83844,

USA

<sup>b</sup>ABB Inc. – USCRC, 131 Phoenix Crossing, Bloomfield, CT, 06002, USA

<sup>c</sup>University of Idaho, Department of Physics, 875 Perimeter Dr., Moscow, ID, 83844, USA

<sup>d</sup>Oklahoma State University, Department of Physics, 145 Physical Sciences Building, Stillwater,

OK, 74028, USA

\*Tel: (208) 885-6387, Email: [ifcheng@uidaho.edu](mailto:ifcheng@uidaho.edu)

### S1. Stability test at pH of 9 and 10

As shown in Figure S1, continuous square wave voltammetry (SWV) scanning between 0.8V to -0.7 V with q-GUITAR in pH 9 buffer is very stable for 20 cycles. In pH 10 buffer, however, the q-GUITAR electrode experienced a peak shifting and current degradation after 12<sup>th</sup> cycle.

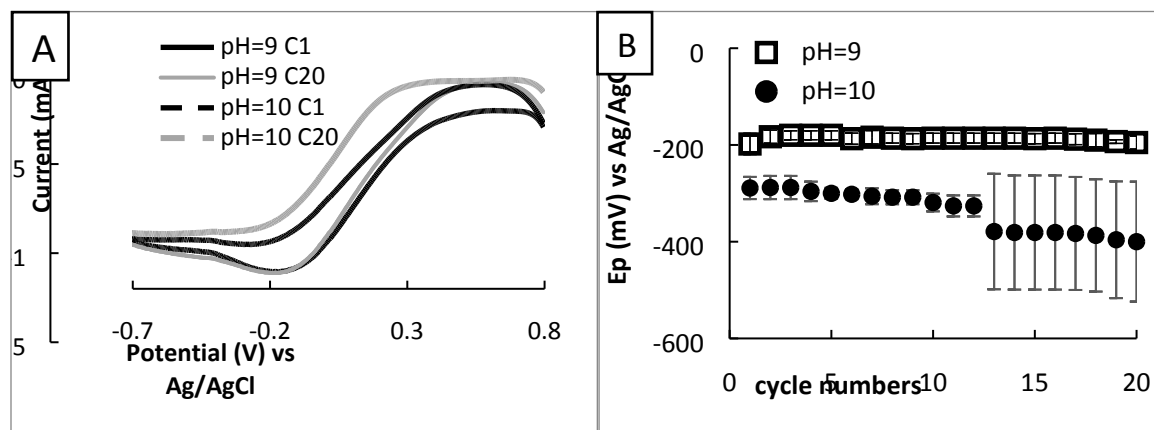

**Figure. S1.** A. The first and 20<sup>th</sup> SWV of q-GUITAR in buffered solution with pH = 9 and 10 in potential range of 0.8 V to -0.7 V. B. The peak potential in buffer with pH = 9 and 10 (n = 4) for 20 continuous SWV scanning.
